# Supplementary material for: Differential diagnosis of acute ocular pain: Teleophthalmology during COVID-19 pandemic - A perspective
Source: PubMed Central journal article supplement — Indian J Ophthalmol. 2020 Jun 25;68(7):1371–9. doi: 10.4103/ijo.IJO_1267_20 (PMC7574141; doi:10.4103/ijo.ijo_1267_20), 2020-06-25
Supplement: IJO-68-1371_App1.pdf [file IJO-68-1371_App1.pdf]

## Appendix 2: Flow chart

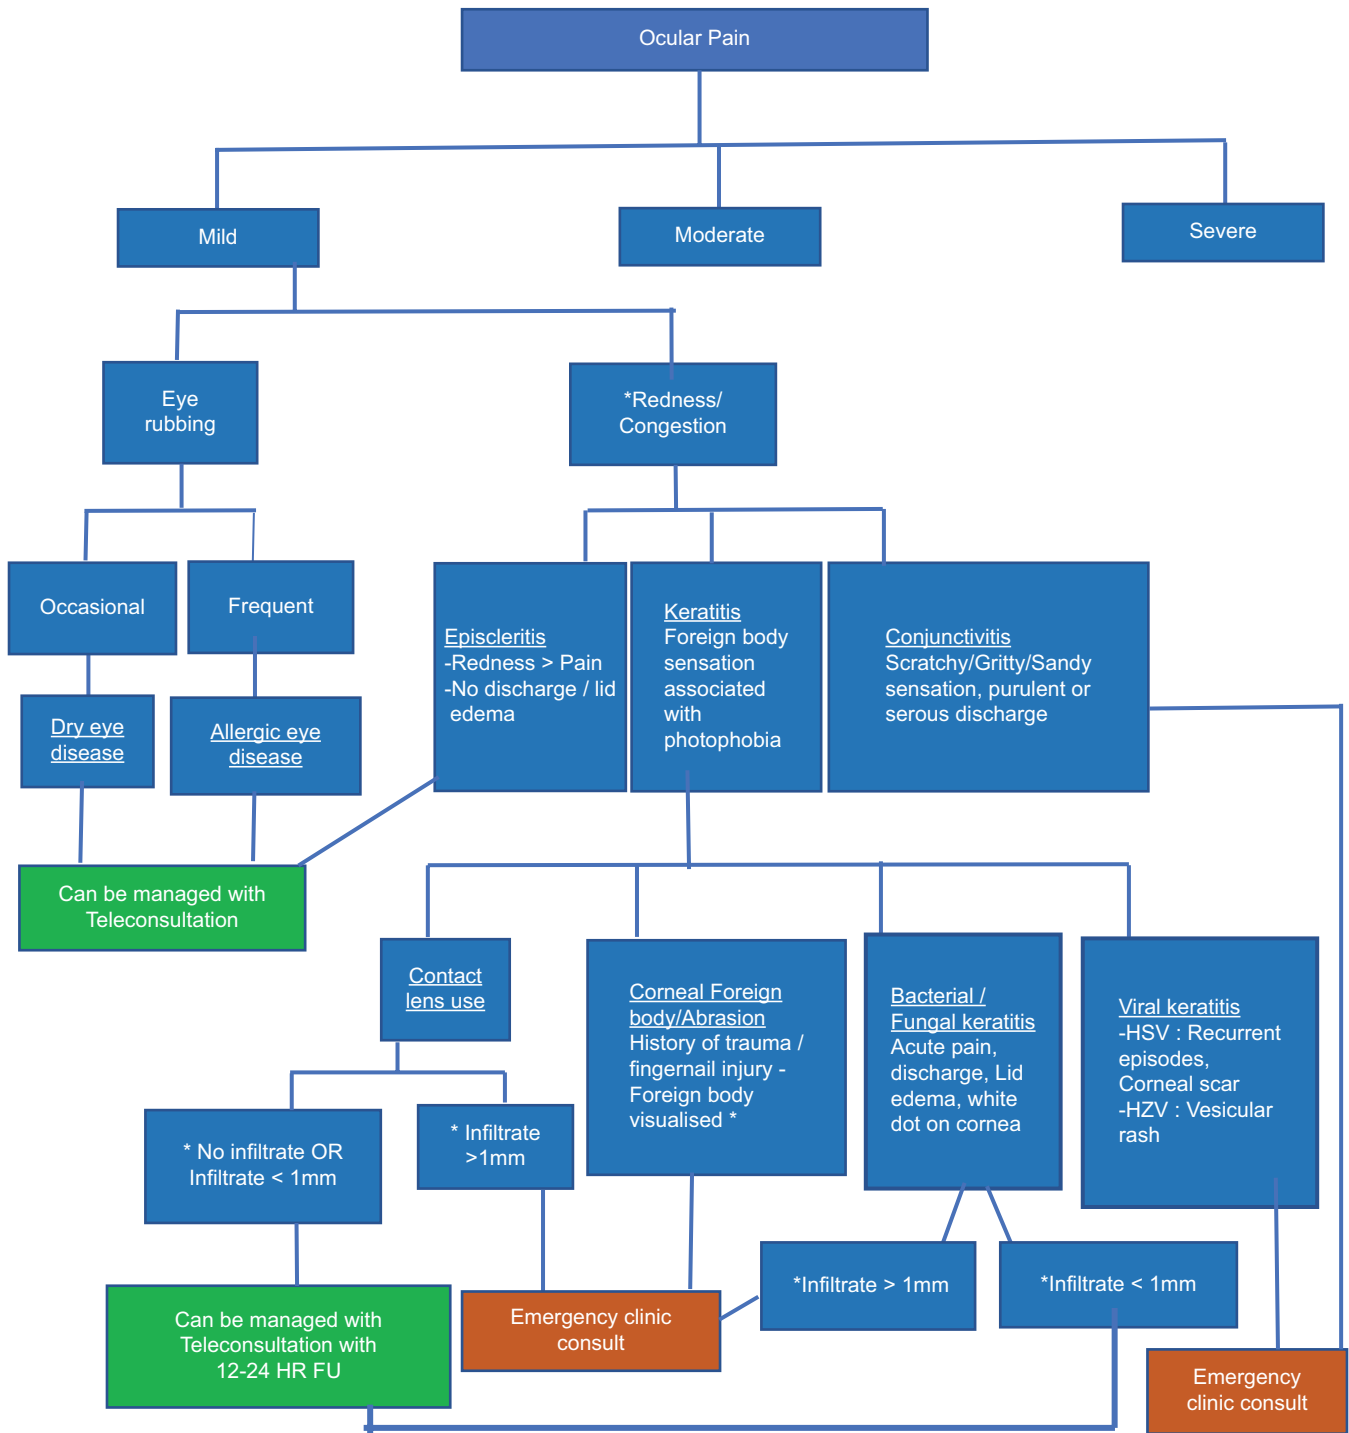

\*On assessment of photo

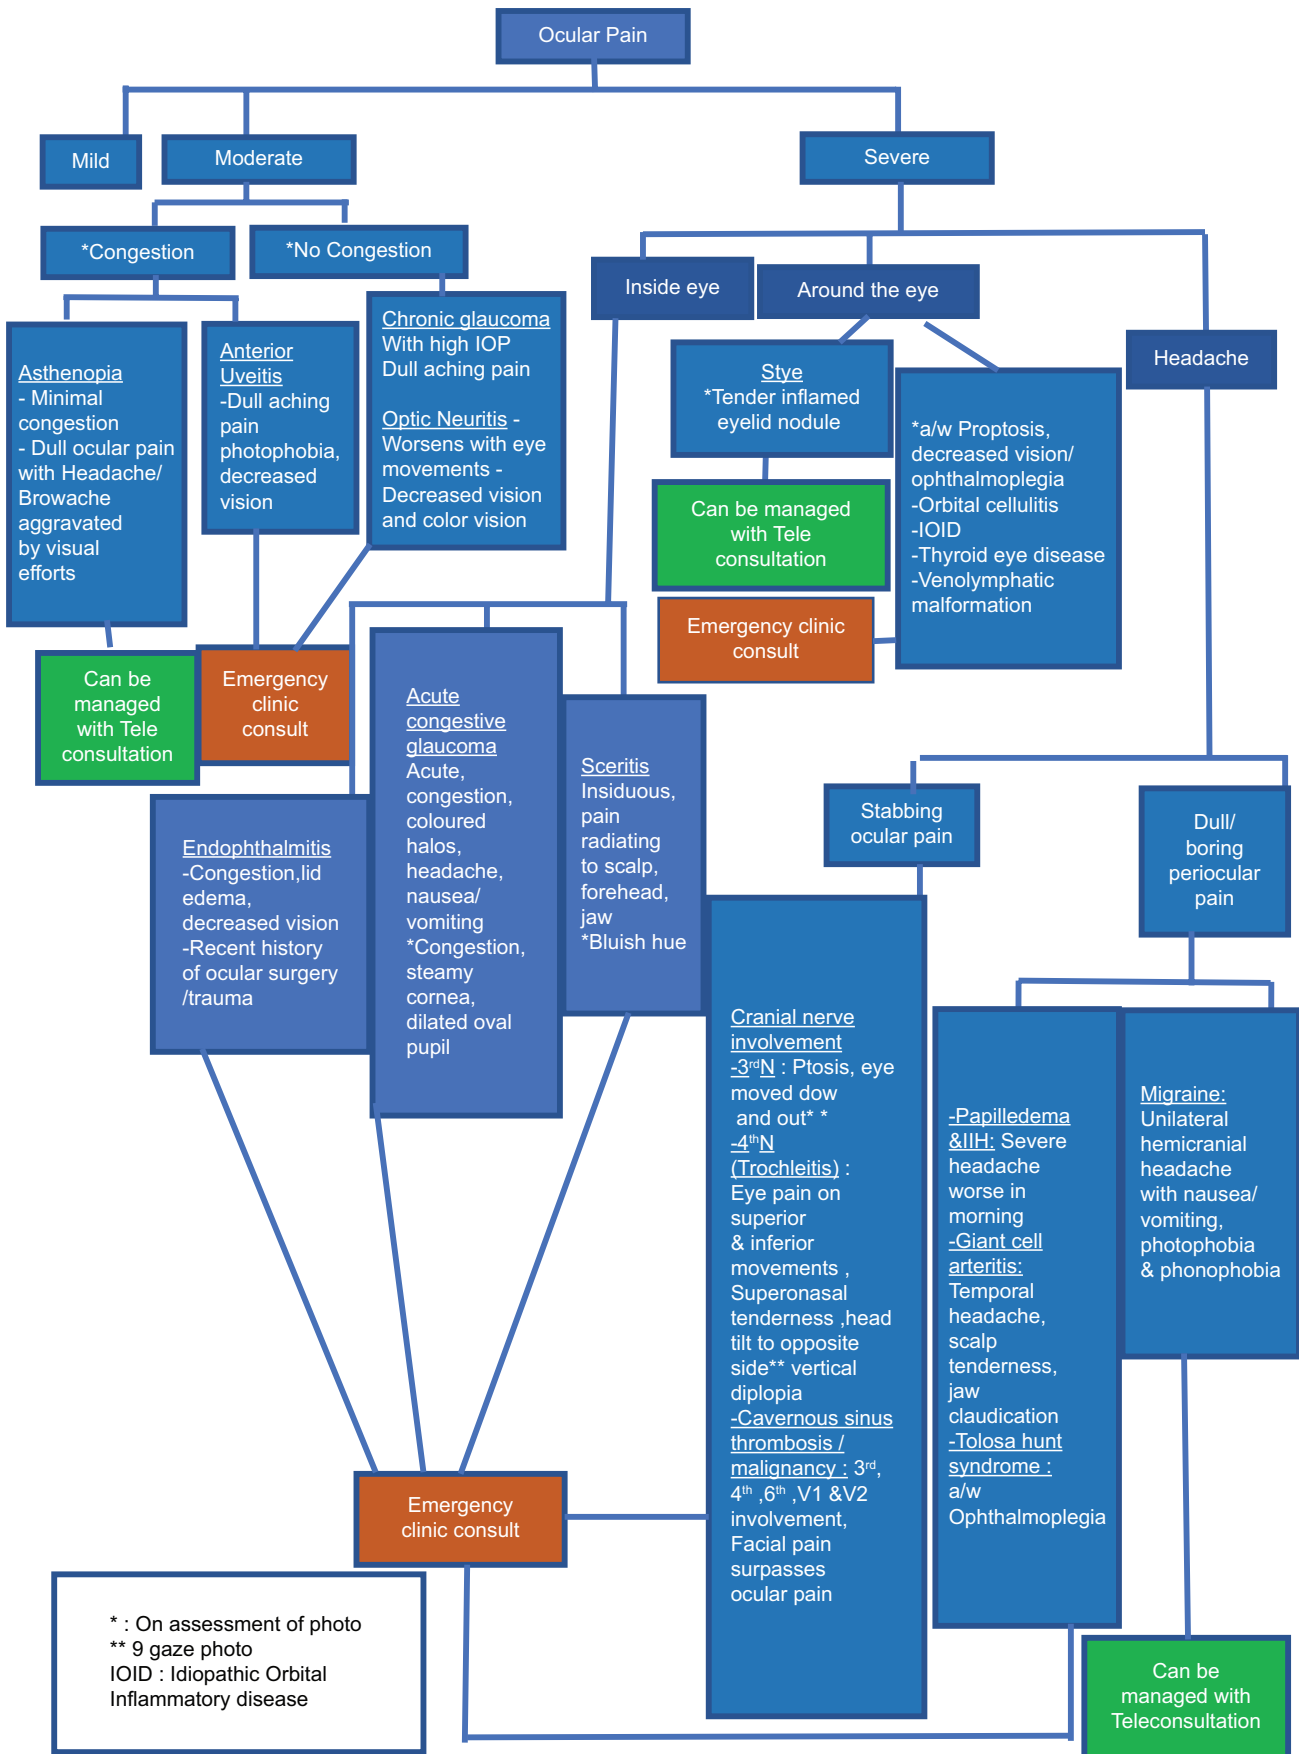

\* : On assessment of photo  
 \*\* 9 gaze photo  
 IOID : Idiopathic Orbital Inflammatory disease
